# Supplementary material for: Diversity of Transgene Integration and Gene Editing Events in Wheat (T<em>riticum aestivum</em> L.) Transgenic Plants Generated Using Agrobacterium-Mediated Transformation
Source: Preprints.org preprint supplement (doi:10.20944/preprints202306.2128.v1), 2023-07-03
Supplement: Supplementary file 1 [file 2023-04-24 Suppl. tables.xlsx]

## Sheet: Supplementary table 1
Supplementary table 1. Optimization of the transgene copy number quantification in wheat T0 transgenics using ddPCR. Comparison between 10 ng and 350 ng gDNA amounts.
Amount of EcoRI-digested gDNA used/sample	350 ng				10 ng
T0 plant #	Target	CNV	PoissonCNVMax	PoissonCNVMin	CNV	PoissonCNVMax	PoissonCNVMin
T0-gRNA#10-1	TaCas9	3.80963	4.08938	3.52987	2.60284	3.03048	2.1752
T0-gRNA#10-2	TaCas9	16.9817	18.0346	15.9288	20.1778	23.7012	16.6544
T0-gRNA#10-3	TaCas9	11.7277	12.3491	11.1062	11.241	12.8797	9.60233
T0-gRNA#10-4	TaCas9	15.5565	16.3259	14.787	16.7517	19.8403	13.663
T0-gRNA#10-5	TaCas9	2.7224	2.8803	2.5645	2.60535	2.90191	2.30879
T0-gRNA#10-8	TaCas9	14.4527	15.0925	13.813	15.0149	17.5449	12.4848
T0-gRNA#10-9	TaCas9	12.5985	13.1638	12.0333	12.9763	14.6035	11.3491
T0-gRNA#10-11	TaCas9	13.6819	14.4561	12.9078	14.9578	17.0823	12.8332
T0-gRNA#10-13	TaCas9	2.79856	3.00121	2.59591	2.87639	3.27603	2.47675
T0-gRNA#10-15	TaCas9	15.7321	16.6418	14.8224	16.6692	18.467	14.8713
T0-gRNA#10-16	TaCas9	13.5209	14.3102	12.7317	12.713	15.1251	10.3009
Fielder Wt	TaCas9	0.0155275	0.0266007	0.0044543	0.0748474	0.144206	0.00548902
CNV - copy number variation
Pearson's correlation on CNV-350 ng vs CNV-10 ng, R value	0.99
Pearson's correlation on CNV-350 ng vs CNV-10 ng, p value	1.24e-08
Note: digestion of PCR products with EcoRI was done for 12 hours

## Sheet: Supplementary table 2
Supplementary table 2. Optimization of the transgene copy number quantification in wheat T0 transgenics using ddPCR. Comparison between 1 hour versus 12 hours of gDNA digestion.
Duration of gDNA digestion	1 hour				12 hours
T0 plant #	Target	CNV	PoissonCNVMax	PoissonCNVMin	CNV	PoissonCNVMax	PoissonCNVMin
T0-gRNA#10-3	TaCas9	14.3218	18.2141	10.4295	11.241	12.8797	9.60233
T0-gRNA#10-4	TaCas9	14.975	16.8487	13.1013	16.7517	19.8403	13.663
T0-gRNA#10-5	TaCas9	2.71251	3.15263	2.27239	2.60535	2.90191	2.30879
T0-gRNA#10-8	TaCas9	13.9205	16.8278	11.0131	15.0149	17.5449	12.4848
T0-gRNA#10-9	TaCas9	12.0667	13.8139	10.3194	12.9763	14.6035	11.3491
T0-gRNA#10-10	TaCas9	17.5957	21.5006	13.6907	15.7451	18.2136	13.2766
T0-gRNA#10-11	TaCas9	12.7316	15.0043	10.4588	14.9578	17.0823	12.8332
T0-gRNA#10-12	TaCas9	2.67963	3.20908	2.15019	2.66373	3.08835	2.23911
T0-gRNA#10-13	TaCas9	2.62514	3.17398	2.07631	2.87639	3.27603	2.47675
T0-gRNA#10-14	TaCas9	3.45254	4.31958	2.58551	2.76649	3.24232	2.29066
Fielder Wt	TaCas9	-	-	-	0.0748474	0.144206	0.00548902
CNV - copy number variation
Pearson's correlation on CNV-1 h vs CNV-12 h, R value	0.97
Pearson's correlation on CNV-1 h vs CNV-12 h, p value	6.98e-08

## Sheet: Supplementary table 3
Supplementary table 3. Estimation of the gene editing rate in T0 and T1 plants versus transgene copy number.
T0 plant #	Gene editing rate, CAPS assay, %	Copy number variation, ddPCR
T0-gRNA#10-1	12.436	3.80963
T0-gRNA#10-2	2.66837	16.9817
T0-gRNA#10-3	4.99922	11.7277
T0-gRNA#10-4	17.0416	15.5565
T0-gRNA#10-5	25.2471	2.7224
T0-gRNA#10-7	16.6557	2.78917
T0-gRNA#10-8	61.6482	14.4527
T0-gRNA#10-9	58.4182	12.5985
T0-gRNA#10-11	12.0933	13.6819
T0-gRNA#10-13	22.4375	2.79856
T0-gRNA#10-15	71.8446	15.7321
T0-gRNA#10-16	61.5795	13.5209
T1 plant #
T1-gRNA#10-1-2	10.3733	2.80834
T1-gRNA#10-1-4	0.24108	3.02109
T1-gRNA#10-2-2	0.209284	2.30172
T1-gRNA#10-2-3	0.136742	19.9661
T1-gRNA#10-3-1	0.140555	11.5795
T1-gRNA#10-3-2	4.53785	5.15918
T1-gRNA#10-4-1	3.35418	20.73
T1-gRNA#10-4-2	6.52758	8.92712
T1-gRNA#10-5-2	8.46951	2.44889
T1-gRNA#10-5-3	8.63165	3.27192
T1-gRNA#10-7-1	1.37026	2.36321
T1-gRNA#10-7-2	1.47453	2.3195
T1-gRNA#10-8-1	1.02035	11.4411
T1-gRNA#10-8-2	89.5527	13.9432
T1-gRNA#10-9-1	38.3464	14.5496
T1-gRNA#10-9-2	86.3556	14.7892
T1-gRNA#10-11-1	0.177135	18.2041
T1-gRNA#10-11-2	10.1806	9.32143
T1-gRNA#10-13-2	21.9114	5.88098
T1-gRNA#10-13-3	7.44008	3.75242
T1-gRNA#10-15-1	0.169348	6.48008
T1-gRNA#10-15-2	0.169998	13.8435
T1-gRNA#10-16-1	0.071097	11.149
T1-gRNA#10-16-2	0.349572	13.899
Pearson's correlation on GE rate vs CNV in T0 plants, R value	0.31
Pearson's correlation on GE rate vs CNV in T1 plants, R value	0.24

## Sheet: Supplementary table 4
Supplementary table 4. Probe-based qPCR analysis of GE events for ten gRNAs in T0 wheat transgenics generated using Agrobacterium-mediated transformation method and the JD633 plasmid.
gRNA	Sample	Expression, ΔΔCt	Expression ΔΔCt SEM	Normalized to WT, ΔΔCtnorm	GE rate, 1/ΔΔCtnorm
gRNA#1	T0-gRNA#1-1	0.35549	0.24738	0.147164	6.79516
gRNA#1	T0-gRNA#1-2	1.89997	0.07576	0.786538	1.27139
gRNA#1	T0-gRNA#1-3	2.1298	0.31571	0.881682	1.1342
gRNA#1	T0-gRNA#1-4	0.98428	0.28049	0.407466	2.45419
gRNA#1	WT	2.41561	0.14688	1	1
gRNA#2	T0-gRNA#2-1	1.04505	0.16759	0.872635	1.14595
gRNA#2	T0-gRNA#2-2	0.92122	0.27472	0.769235	1.29999
gRNA#2	T0-gRNA#2-3	0.82656	0.0439	0.690192	1.44887
gRNA#2	T0-gRNA#2-4	0.72195	0.04013	0.602841	1.65881
gRNA#2	T0-gRNA#2-5	0.87698	0.11093	0.732293	1.36557
gRNA#2	T0-gRNA#2-6	0.94332	0.07086	0.787689	1.26954
gRNA#2	T0-gRNA#2-7	1	0.03799	0.835017	1.19758
gRNA#2	T0-gRNA#2-8	0.77361	0.05209	0.645978	1.54804
gRNA#2	T0-gRNA#2-9	0.50759	0.02227	0.423846	2.35935
gRNA#2	T0-gRNA#2-10	0.4489	0.16523	0.374839	2.66781
gRNA#2	WT	1.19758	0.39924	1	1
gRNA#3	T0-gRNA#3-1	1.31981	0.1963	1.01338	0.986801
gRNA#3	T0-gRNA#3-2	1.04627	0.0881	0.803346	1.24479
gRNA#3	T0-gRNA#3-3	1.32158	0.06978	1.01473	0.98548
gRNA#3	T0-gRNA#3-4	0.77538	0.05234	0.595352	1.67968
gRNA#3	T0-gRNA#3-5	0.84607	0.15745	0.649629	1.53934
gRNA#3	WT	1.30239	0.02596	1	1
gRNA#4	T0-gRNA#4-1	1.06326	0.13741	0.812871	1.23021
gRNA#4	T0-gRNA#4-2	0.89787	0.15433	0.686429	1.45681
gRNA#4	T0-gRNA#4-3	1.11911	0.07181	0.855569	1.16881
gRNA#4	T0-gRNA#4-4	1	0.12998	0.764508	1.30803
gRNA#4	T0-gRNA#4-5	1.02788	0.22112	0.785823	1.27255
gRNA#4	T0-gRNA#4-6	1.11153	0.23105	0.849774	1.17678
gRNA#4	T0-gRNA#4-7	0.74281	0.06905	0.567885	1.76092
gRNA#4	T0-gRNA#4-8	0.18323	0.01293	0.140081	7.13873
gRNA#4	T0-gRNA#4-9	0.99157	0.06744	0.758064	1.31915
gRNA#4	T0-gRNA#4-10	1.25617	0.08035	0.960353	1.04128
gRNA#4	WT	1.30803	0.07188	1	1
gRNA#5	T0-gRNA#5-1	1.00208	0.2058	0.897479	1.11423
gRNA#5	T0-gRNA#5-2	0.77586	0.28045	0.694873	1.43911
gRNA#5	T0-gRNA#5-3	0.81754	0.28576	0.732202	1.36574
gRNA#5	T0-gRNA#5-4	0.66873	0.04627	0.598925	1.66966
gRNA#5	T0-gRNA#5-5	0.91678	0.18197	0.821083	1.2179
gRNA#5	T0-gRNA#5-6	0.708	0.1228	0.634096	1.57705
gRNA#5	WT	1.11655	0.12043	1	1
gRNA#6	T0-gRNA#6-1	0.8097	0.0684	0.596113	1.67753
gRNA#6	T0-gRNA#6-2	0.74961	0.01815	0.551874	1.81201
gRNA#6	T0-gRNA#6-3	0.60604	0.01703	0.446175	2.24127
gRNA#6	T0-gRNA#6-4	0.44731	0.03838	0.329316	3.0366
gRNA#6	T0-gRNA#6-5	0.34981	0.03718	0.257535	3.88297
gRNA#6	WT	1.3583	0.08889	1	1
gRNA#7	T0-gRNA#7-1	0.75866	0.05214	0.617183	1.62026
gRNA#7	T0-gRNA#7-2	1.24957	0.03072	1.01655	0.983722
gRNA#7	T0-gRNA#7-3	1	0.16753	0.813517	1.22923
gRNA#7	T0-gRNA#7-4	0.59415	0.02456	0.483351	2.06889
gRNA#7	WT	1.22923	0.07484	1	1
gRNA#8	T0-gRNA#8-1	0.72363	0.08455	0.604779	1.6535
gRNA#8	T0-gRNA#8-2	0.7502	0.10854	0.626985	1.59493
gRNA#8	T0-gRNA#8-3	0.61848	0.10929	0.516899	1.93461
gRNA#8	WT	1.19652	0.07297	1	1
gRNA#9	T0-gRNA#9-1	0.00958	0.00075	0.0084386	118.503
gRNA#9	T0-gRNA#9-2	0.23798	0.03027	0.209626	4.7704
gRNA#9	T0-gRNA#9-3	0.19379	0.03419	0.170701	5.8582
gRNA#9	T0-gRNA#9-4	0.02987	0.00541	0.0263112	38.0067
gRNA#9	T0-gRNA#9-5	0.13212	0.01932	0.116379	8.59264
gRNA#9	WT	1.13526	0.02726	1	1
gRNA#10	T0-gRNA#10-19	0.46118	0.01801	0.288846	3.46205
gRNA#10	T0-gRNA#10-21	0.57039	0.04946	0.357246	2.79919
gRNA#10	T0-gRNA#10-34	0.37664	0.02364	0.235897	4.23914
gRNA#10	T0-gRNA#10-35	0.67279	0.12548	0.421381	2.37315
gRNA#10	T0-gRNA#10-36	0.79499	0.04109	0.497917	2.00836
gRNA#10	T0-gRNA#10-24	0.53368	0.04677	0.334254	2.99174
gRNA#10	T0-gRNA#10-25	0.58568	0.11552	0.366823	2.72611
gRNA#10	T0-gRNA#10-28	0.78979	0.09349	0.494661	2.02159
gRNA#10	T0-gRNA#10-29	0.79029	0.24596	0.494974	2.02031
gRNA#10	T0-gRNA#10-30	0.65242	0.10902	0.408623	2.44724
gRNA#10	T0-gRNA#10-31	0.62427	0.04555	0.390992	2.5576
gRNA#10	T0-gRNA#10-32	0.80692	0.06851	0.505389	1.97867
gRNA#10	T0-gRNA#10-33	0.86688	0.23399	0.542944	1.84181
gRNA#10	WT	1.59663	0.27227	1	1

## Sheet: Supplementary table 5
Supplementary table 5. Epigenetic profile at the gRNA target regions.
gRNA#	Chromosome	gRNA genomic coordinates, IWGSC RefSeq v1.0	DNA methylation	H3K4me3	H3K9ac	H3K27me3	H3K36me3	ATAC seq	ChIP RNA Polymerase	Mean DNA methylation	Mean H3K4me3	Mean H3K9ac	Mean H3K27me3	Mean H3K36me3	Mean ATAC seq	Mean ChIP RNA Polymerase	Target gene	Homeolog ID
gRNA#1	1A	582276888..582276910	0.0178744	4.1429	5.26292	1.95635	4.72756	8.19048	68.8696	0.0211096	5.28892	6.35322	2.37324	5.75868	4.47619	62.9565	TRYPTOPHAN SYNTHASE, ALPHA CHAIN (TaTRP_SYNTHASE_SUA)	TraesCS1A02G428400
	1B	675374152..675374174	0.0454546	6.08027	7.19722	3.21632	6.55052	5.2381	58									TraesCS1B02G463100
	1D	485053950..485053972	0	5.6436	6.59951	1.94705	5.99797	0	62									TraesCS1D02G437700
gRNA#2*	2A	728407304..728407326	0	1.53857	0.995427	-0.174498	2.97583	0	40	0	1.00856	1.60788	-0.111704	3.10374	0	36	INOSITOL TETRA-/PENTAPHOSPHATE 2-KINASE (TaIPK1)	TraesCS2A02G497700
	2B	719967501..719967523	0	0.47854	2.22033	-0.0489096	3.23164	0	32									TraesCS2B02G525900
	2D	593511548..593511570	-	-	-	-	-	-	-									TraesCS2D02G612600LC
gRNA#3	2A	728407709..728407731	0.172043	1.35135	2.06413	-0.722466	3.75392	0	52	0.218459	1.26863	1.53641	-0.739239	3.37241	0	51	INOSITOL TETRA-/PENTAPHOSPHATE 2-KINASE (TaIPK1)	TraesCS2A02G497700
	2B	719967902..719967924	0.25	1.6939	1.70261	0.714156	3.47732	0	49									TraesCS2B02G525900
	2D	593511939..593511961	0.233333	0.76065	0.842499	-2.20941	2.88598	0	52									TraesCS2D02G612600LC
gRNA#4	2A	751009196..751009218	0.0208333	4.4119	5.55449	1.30374	5.14766	0	92.3043	0.00694445	4.45078	5.53197	1.41536	5.3089	0	95.7681	MANGANESE-SUPEROXIDE DISMUTASE (TaMnSOD)	TraesCS2A02G537100
	2B	758596951..758596973	0	3.88975	4.71503	0.231646	4.61886	0	94									TraesCS2B02G567600
	2D	619563105..619563127	0	5.05069	6.32638	2.7107	6.16018	0	101									TraesCS2D02G538300
gRNA#5	5A	334265016..334265038	0.233333	2.75275	0.731183	2.66903	2.63227	0	11	0.28912	1.84242	1.06261	1.20288	1.64864	0	17.6667	WHEAT PROLAMIN-BOX BINDING FACTOR (TaWPBF)	TraesCS5A02G155900
	5B	283624047..283624069	0.259028	0.590397	0.180084	-0.0523046	0.831488	0	15									TraesCS5B02G154100
	5D	251064145..251064167	0.375	2.18411	2.27656	0.991905	1.48217	0	27									TraesCS5D02G161000
gRNA#6	5A	360081599..360081621	0.178571	1.82821	1.14482	0.939992	4.20386	0	77.1739	0.151106	0.95614	0.959009	0.909926	3.88609	0	90.0435	DEMETER (TaDME)	TraesCS5A02G169000
	5B	307408082..307408104	0.141414	0.95614	0.959009	0.909926	3.88609	0	98.9565									TraesCS5B02G165800
	5D	270272519..270272541	0.133333	0.692818	1.11851	-0.38247	3.14445	0	94									TraesCS5D02G173300
gRNA#7	5A	360082862..360082884	0	1.53605	0.111031	0	0	0	53	0.0511905	1.83772	0.648985	0	2.372	0	65	DEMETER (TaDME)	TraesCS5A02G169000
	5B	307409366..307409388	0.0107143	1.63227	0.765535	0	3.34199	0	83									TraesCS5B02G165800
	5D	270273800..270273822	0.142857	2.34483	1.07039	0	3.774	0	59									TraesCS5D02G173300
gRNA#8	5A	432446626..432446648	0.20404	1.73785	1.43361	0.307784	0.590815	1.61905	43	0.180567	0.937543	0.957593	0.0167207	0.355272	57.7144	38.8696	QUANTITATIVE TRAIT LOCUS ON SEED DORMANCY 1 (TaQSD1)	TraesCS5A02G216200
	5B	387743341..387743363	0.14375	0.566113	0.756668	-0.143884	0.563548	171.524	42									TraesCS5B02G214700
	5D	332043289..332043311	0.19391	0.508667	0.6825	-0.113738	-0.0885456	0	31.6087									TraesCS5D02G224200
gRNA#9	5A	432447621..432447643	0.0132275	2.69032	2.29418	0.442872	0.400916	0	45	0.00632207	2.89069	2.59182	1.20263	0.87548	58.2857	37.4203	QUANTITATIVE TRAIT LOCUS ON SEED DORMANCY 1 (TaQSD1)	TraesCS5A02G216200
	5B	387744361..387744383	0	2.82991	3.15809	1.25239	1.02106	174.857	51									TraesCS5B02G214700
	5D	332044290..332044312	0.00573871	3.15184	2.3232	1.91262	1.20447	0	16.2609									TraesCS5D02G224200
gRNA#10	6A	237734961..237734982	0.00107412	3.17951	5.7339	1.34483	4.84097	1.2381	48	0.0184365	2.89381	4.71051	0.588893	3.97288	13.3175	48.6667	GRAIN WIDTH and WEIGHT2 (TaGW2)	TraesCS6A02G189300
	6B	291761523..291761544	0.0169492	2.27837	3.89699	-0.215013	3.1879	38.7143	46									TraesCS6B02G215300
	6D	175712547..175712568	0.0372863	3.22354	4.50063	0.636863	3.88976	0	52									TraesCS6D02G176900
* - epigenetic marks and GE rate for the sub-genome D were not included in the analysis.
Pearson's correlation analysis between the epigenetic mark and GE rate for corresponding gRNAs
Epigenetic mark	R	p
ATAC_seq	0.68	0.032
ChIP_RNAPII	-0.2	0.573
H3K27me3	0.239	0.506
H3K36me3	-0.394	0.259
H3K4me3	0.135	0.711
H3K9ac	0.039	0.914
mDNA	-0.324	0.36

## Sheet: Supplementary table 6
Supplementary table 6. Primers used in the study.
Primer name	Primer sequence	Primer description	PCR product size, bp
HYG-F	ATGAAAAAGCCTGAACTCACCGCGAC	Primers for amplification of the hygromycin selection gene in transgenic plants.	1026
HYG-R	CTATTTCTTTGCCCTCGGACGAGTGC
gRNA#10-CAPS-F	ATGGGGAACAGAATAGGAGG	Primers for CAPS assay. Amplify regions around gRNA#10. Universal for three sub-genomes.	197
gRNA#10-CAPS-R	AGGAAGCAGATGGGGCACTC
gRNA#10-CAPS-Univ-F	ATGGGGAACAGAATAGGAGGGA	Universal forward primer for amplification of TaGW2-gA, B and D fragment around conservative gRNA#10 for CAPS assay.
gRNA#10-CAPS_sgA-R	ACGCATCAAACGTACGTTCC	Reverse primer for amplifying TaGW2-gA fragment around conservative gRNA#10 for CAPS assay.	327
gRNA#10-CAPS_sgB-R	GCGCATCAAACGTACGTTCC	Reverse primer for amplifying TaGW2-gB fragment around conservative gRNA#10 for CAPS assay.	327
gRNA#10-CAPS_sgD-R	ACGCATCAAACGTCCATCCC	Reverse primer for amplifying TaGW2-gD fragment around conservative gRNA#10 for CAPS assay.	322
JD633-F	TGTTGGATCTCTTCTGCAGCAT	Forward primer for JD633
LB-F1	TGGCAGGATATATTGTGGTGT	Primers for checking the integrity of the left border.	500
LB-F2	CTGAATTAACGCCGAATTAATTC		425
LB-F3	CTATTTCTTTGCCCTCGGACGAGTGC		183
LB-R	AATTTCGATGATGCAGCTTGGG
RB-F	ACTTCTCGCGCCCTGCTACCCGG	Primers for checking the integrity of the right border.
RB-R1	ATCGGTGCGGGCCTCTT		355
RB-R2	ACCCGCCAATATATCCTGTCAA		233
TaGA3PD-F	TATGTTTGTGGTTGGTGTCA	ddPCR primers for probe-based detection of TaGA3PD housekeeping gene. Universal for three sub-genomes. Forward primer.
TaGA3PD-R	GTGGTCATCAAACCCTCAAT	Reverse primer.
TaGA3PD-P	TAGCTGCACCACTAACTGCC	Probe. The transgene probe has 5ʹ HEX™ (hexachloro-fluorescein)-labeled. Probe is double-quenched with ZEN™ and Iowa Black Hole Quencher® 1 (Integrated DNA Technologies, Coralville, IA, USA).
PINb-D1b-F	AGTTGGCGGCTGGTACAATG	Primers and probe for single copy wheat gene PINb-D1b to check transgene copy number using ddPCR. June 08/22: AB224 and AB225 are single tubes PrimeTime qPCR Assays stored in dry form. Taken from https://onlinelibrary.wiley.com/doi/full/10.1111/tpj.13517
PINb-D1b-R	ACATCGCTCCATCACGTAATCC
PINb-D1b-P	TCAACAATGTCCGCAGGAGCG	The transgene probe has 5ʹ HEX™ (hexachloro-fluorescein)-labeled. Probe is double-quenched with ZEN™ and Iowa Black Hole Quencher® 1 (Integrated DNA Technologies, Coralville, IA, USA).
TaCas9-F	CTACCACGAGAAGTACCCTA	Primers and probe for TaCas9 from JD633 plasmid to check expression using ddPCR.
TaCas9-R	AGGTAGATCAGTCTGAGGTC
TaCas9-P	ACCATCTGCGGAAGAAGCTC	The reference gene probes were 5′ FAM™ (6-fluorescein)-labeled. Probe is double-quenched with ZEN™ and Iowa Black Hole Quencher® 1 (Integrated DNA Technologies, Coralville, IA, USA).
qPCR-gRNA#1-F	CCATCAGGGCGTCCG	qPCR primers/probe mix for checking editing efficiency at gRNA#1 cut site. Universal for three subgenomes.
qPCR-gRNA#1-R	CCTTGAGGTTGGTGAA
qPCR-gRNA#1-P	TGGCCGGGGACAAGCGC	The reference gene probes were 5′ FAM™ (6-fluorescein)-labeled. Probe is double-quenched with ZEN™ and Iowa Black Hole Quencher® 1 (Integrated DNA Technologies, Coralville, IA, USA).
qPCR-gRNA#2-F	TTCTGTGGCACAAGCTTATG	qPCR primers/probe mix for checking editing efficiency at gRNA#2 cut site. Universal for three subgenomes.
qPCR-gRNA#2-R	ATCAACATGATCGTGCCC
qPCR-gRNA#2-P	AGTACATGTCATGAGCCAACATCT	The reference gene probes were 5′ FAM™ (6-fluorescein)-labeled. Probe is double-quenched with ZEN™ and Iowa Black Hole Quencher® 1 (Integrated DNA Technologies, Coralville, IA, USA).
qPCR-gRNA#3-F	TGTTGGAAAGAATGTGCTCA	qPCR primers/probe mix for checking editing efficiency at gRNA#3 cut site. Universal for three subgenomes.
qPCR-gRNA#3-R	ATTAGAAGGGCAGAATCAGC
qPCR-gRNA#3-P	TGCTTGGCGAGTGAATGCAAGC	The reference gene probes were 5′ FAM™ (6-fluorescein)-labeled. Probe is double-quenched with ZEN™ and Iowa Black Hole Quencher® 1 (Integrated DNA Technologies, Coralville, IA, USA).
qPCR-gRNA#4-F	ACCTACGTCGCCAACTA	qPCR primers/probe mix for checking editing efficiency at gRNA#4 cut site. Universal for three subgenomes.
qPCR-gRNA#4-R	TGGAGGTGGACGACG
qPCR-gRNA#4-P	AACAAGGCGCTCGAGCAG	The reference gene probes were 5′ FAM™ (6-fluorescein)-labeled. Probe is double-quenched with ZEN™ and Iowa Black Hole Quencher® 1 (Integrated DNA Technologies, Coralville, IA, USA).
qPCR-gRNA#5-F	CAGAGCAGAAGGTGGAAT	qPCR primers/probe mix for checking editing efficiency at gRNA#5 cut site. Universal for three subgenomes.
qPCR-gRNA#5-R	TGTTGTAGTAGCAGAACTTGG
qPCR-gRNA#5-P	CTCGGTGCAAGTCTGGCAA	The reference gene probes were 5′ FAM™ (6-fluorescein)-labeled. Probe is double-quenched with ZEN™ and Iowa Black Hole Quencher® 1 (Integrated DNA Technologies, Coralville, IA, USA).
qPCR-gRNA#6-F	GTTATCTCTGGACCTCATGC	qPCR primers/probe mix for checking editing efficiency at gRNA#6 cut site. Universal for three subgenomes.
qPCR-gRNA#6-R	TTTTCTTTTCCCTTTCCCCT
qPCR-gRNA#6-P	CGCATGGTGCTCTTGTCCCTT	The reference gene probes were 5′ FAM™ (6-fluorescein)-labeled. Probe is double-quenched with ZEN™ and Iowa Black Hole Quencher® 1 (Integrated DNA Technologies, Coralville, IA, USA).
qPCR-gRNA#7-F	AGTTTACCACCAGTCCTAGT	qPCR primers/probe mix for checking editing efficiency at gRNA#7 cut site. Universal for three subgenomes.
qPCR-gRNA#7-R	CTCTGCTGGTCAAGATTCAT
qPCR-gRNA#7-P	AAACAGGTGGTGCACTTGGA	The reference gene probes were 5′ FAM™ (6-fluorescein)-labeled. Probe is double-quenched with ZEN™ and Iowa Black Hole Quencher® 1 (Integrated DNA Technologies, Coralville, IA, USA).
qPCR-gRNA#8-F	CAGGGATGAAACTCGTATG	qPCR primers/probe mix for checking editing efficiency at gRNA#8 cut site. Universal for three sub-genomes.
qPCR-gRNA#8-R	CTCAATAATCTTCCGCGCT
qPCR-gRNA#8-P	ATTCAGCCCATGTGCCATAAATAG	The reference gene probes were 5′ FAM™ (6-fluorescein)-labeled. Probe is double-quenched with ZEN™ and Iowa Black Hole Quencher® 1 (Integrated DNA Technologies, Coralville, IA, USA).
qPCR-gRNA#9-F	GAGACCATAAACCCCAAG	qPCR primers/probe mix for checking editing efficiency at gRNA#9 cut site. Universal for three sub-genomes.
qPCR-gRNA#9-R	GTGCCTGGCGATCTC
qPCR-gRNA#9-P	TCGACTACGAGCCCTGCG	The reference gene probes were 5′ FAM™ (6-fluorescein)-labeled. Probe is double-quenched with ZEN™ and Iowa Black Hole Quencher® 1 (Integrated DNA Technologies, Coralville, IA, USA).
qPCR-gRNA#10-F	TGATCCTCGAGGCCAAG	qPCR primers/probe mix for checking editing efficiency at gRNA#10 cut site. Universal for three sub-genomes
qPCR-gRNA#10-R	CTCCTCCAGGTCACCC
qPCR-gRNA#10-P	CTACCCGGGGGCTGACGAC	The reference gene probes were 5′ FAM™ (6-fluorescein)-labeled. Probe is double-quenched with ZEN™ and Iowa Black Hole Quencher® 1 (Integrated DNA Technologies, Coralville, IA, USA).
Primers used to clone gRNA seeding sequences into JD633 plasmid.
Primer name	Sequence	Target gene
gRNA#1-F	acttGCGCTTGTCCCCGGCCACGG	TRYPTOPHAN SYNTHASE, ALPHA CHAIN (TaTRP_SYNTHASE_SUA)
gRNA#1-R	aaacCCGTGGCCGGGGACAAGCGC
gRNA#2-F	acttATGTCATGAGCCAACATCTG	INOSITOL TETRA-/PENTAPHOSPHATE 2-KINASE (TaIPK1)
gRNA#2-R	aaacCAGATGTTGGCTCATGACAT
gNRA#3-F	acttCATTCACTCGCCAAGCAGGA	INOSITOL TETRA-/PENTAPHOSPHATE 2-KINASE (TaIPK1)
gRNA#3-R	aaacTCCTGCTTGGCGAGTGAATG
gRNA#4-F	acttCTACGTCGCCAACTACAACA	MANGANESE-SUPEROXIDE DISMUTASE (TaMnSOD)
gRNA#4-R	aaacTGTTGTAGTTGGCGACGTAG
gNRA#5-F	acttGTGTTGCCAGACTTGCACCG	WHEAT PROLAMIN-BOX BINDING FACTOR (TaWPBF)
gRNA#5-R	aaacCGGTGCAAGTCTGGCAACAC
gRNA#6-F	acttTAAGGGACAAGAGCACCATG	DEMETER (TaDME)
gRNA#6-R	aaacCATGGTGCTCTTGTCCCTTA
gRNA#7-F	acttAGTCCTTACAGGCAAACAGG	DEMETER (TaDME)
gRNA#7-R	aaacCCTGTTTGCCTGTAAGGACT
gRNA#8-F	acttCATGTGCCATAAATAGAGCG	QUANTITATIVE TRAIT LOCUS ON SEED DORMANCY 1 (TaQSD1)
gRNA#8-R	aaacCGCTCTATTTATGGCACATG
gRNA#9-F	acttATCTTCGACTACGAGCCCTG	QUANTITATIVE TRAIT LOCUS ON SEED DORMANCY 1 (TaQSD1)
gRNA#9-R	aaacCAGGGCTCGTAGTCGAAGAT
gRNA#10-F	acttCTCGCGCCCTGCTACCCGG	GRAIN WIDTH and WEIGHT2 (TaGW2)
gRNA#10-R	aaacCCGGGTAGCAGGGCGCGAG
Overhead nucleotides are highlighted in red.
